# Supplementary material for: Crystal structures of two phytohormone signal-transducing α/β hydrolases: karrikin-signaling KAI2 and strigolactone-signaling DWARF14
Source: PubMed Central journal article supplement — Cell Res. 2013 Feb 5;23(3):436–9. doi: 10.1038/cr.2013.19 (PMC3587710; doi:10.1038/cr.2013.19), 2013-02-05
Supplement: cr201319x1.pdf [file cr201319x1.pdf]

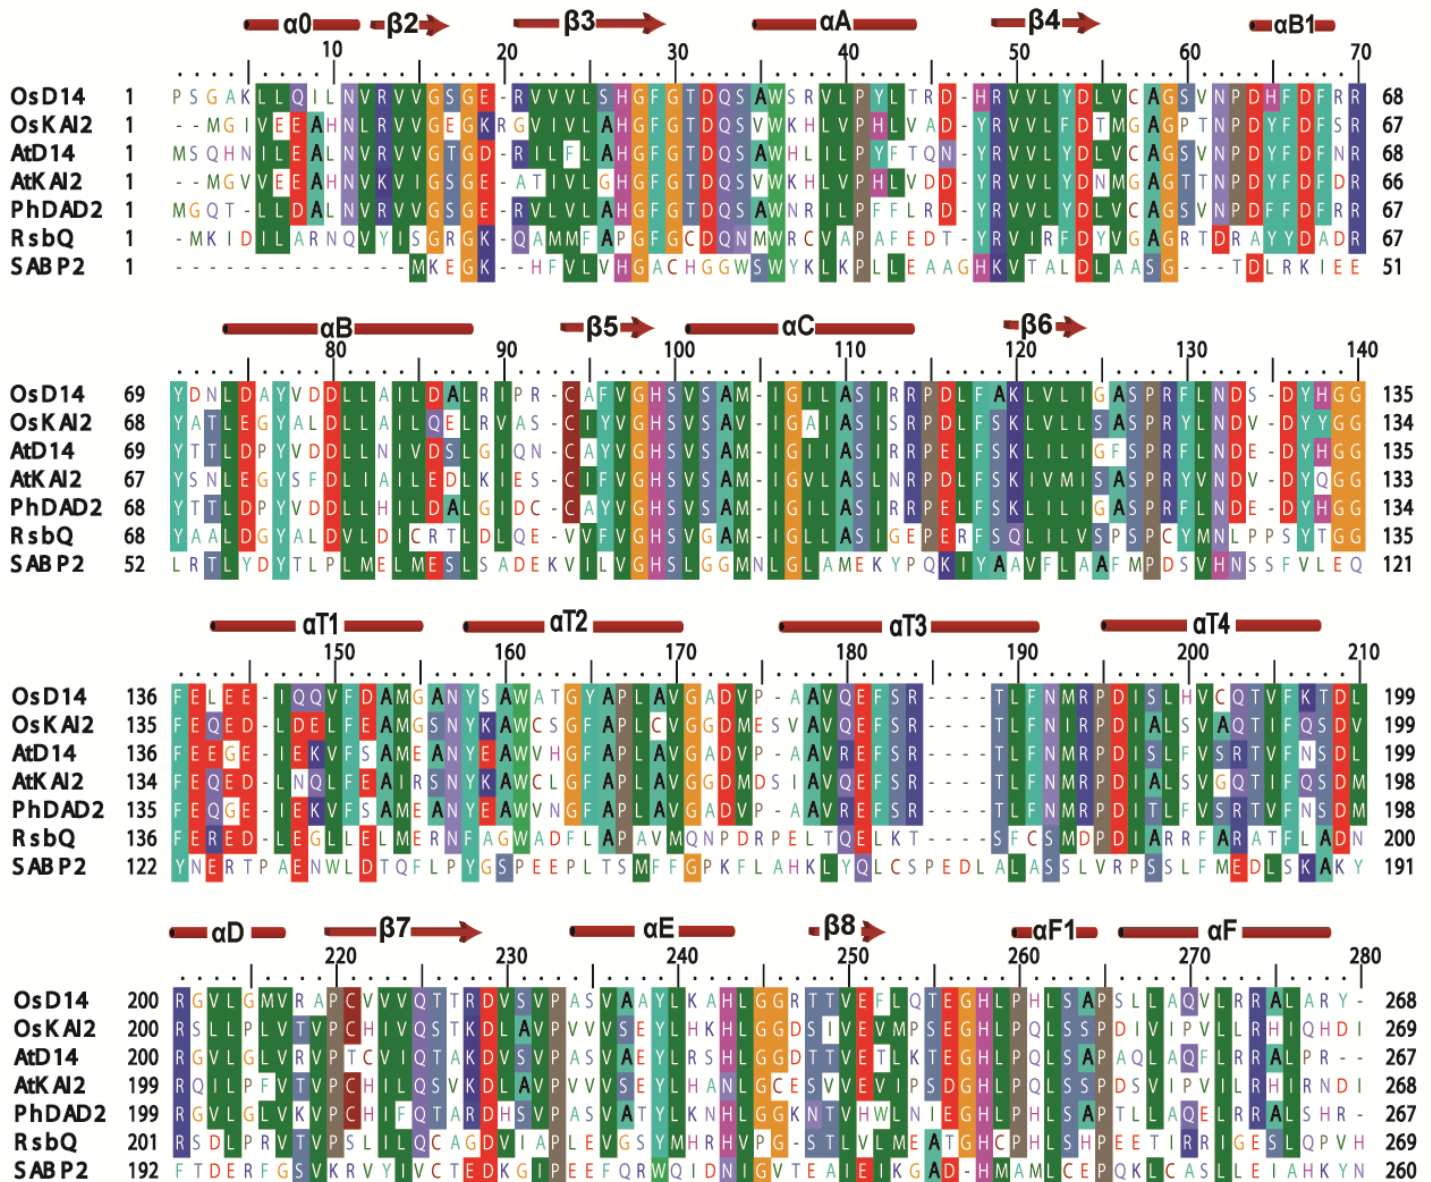

**Supplementary information, Figure S1** Sequence alignment of KAI2 and D14 proteins from rice (*Os*) and from *Arabidopsis* (*At*) with the petunia (*Ph*) D14 ortholog DAD2, bacterial RbsQ, and SABP2 from tobacco. Note that the D14 protein from rice has a non-conserved 50 amino acid N-terminal extension that has been omitted in the alignment. The secondary structure assignment is based on the crystal structure of KAI2 and the labels of the major strands and helices are based on those of the canonical  $\alpha/\beta$  hydrolase fold.
