# Supplementary material for: Crystal structures of two phytohormone signal-transducing α/β hydrolases: karrikin-signaling KAI2 and strigolactone-signaling DWARF14
Source: PubMed Central journal article supplement — Cell Res. 2013 Feb 5;23(3):436–9. doi: 10.1038/cr.2013.19 (PMC3587710; doi:10.1038/cr.2013.19), 2013-02-05
Supplement: cr201319x2.pdf [file cr201319x2.pdf]

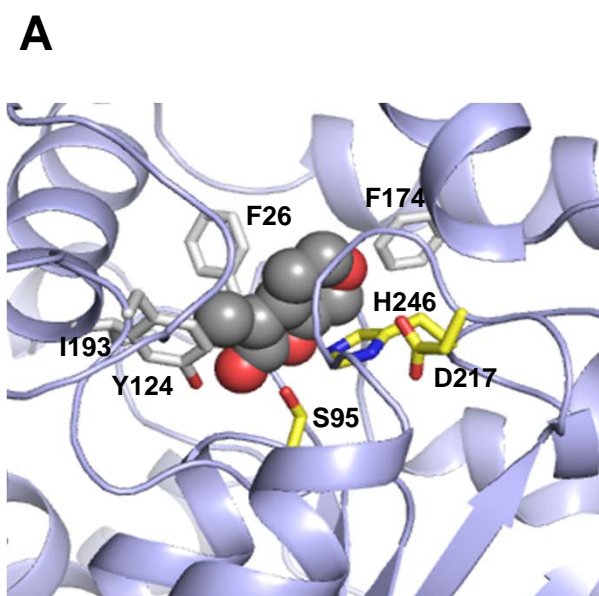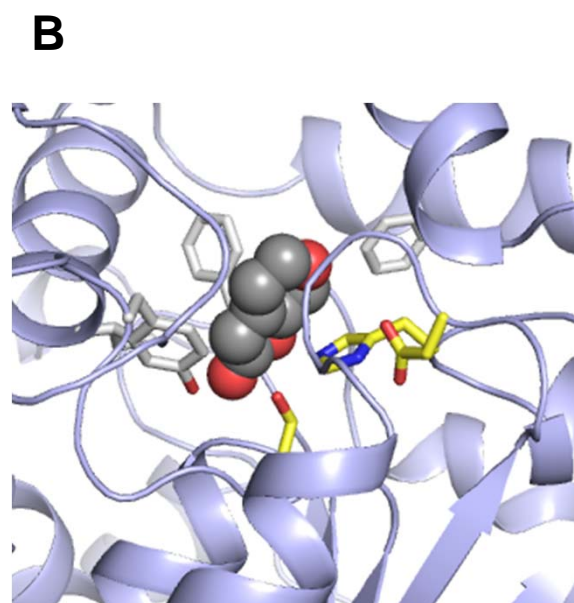

**Supplementary information, Figure S2** Comparison of the docking of karrikin 1 (**A**) and karrikin 2 (**B**) into the ligand binding pocket of KAI2. The two karrikins are presented as ball models. Panel A is the same as the bottom part of panel B of the main text Figure 1.
