# Supplementary material for: Crystal structures of two phytohormone signal-transducing α/β hydrolases: karrikin-signaling KAI2 and strigolactone-signaling DWARF14
Source: PubMed Central journal article supplement — Cell Res. 2013 Feb 5;23(3):436–9. doi: 10.1038/cr.2013.19 (PMC3587710; doi:10.1038/cr.2013.19), 2013-02-05
Supplement: cr201319x3.pdf [file cr201319x3.pdf]

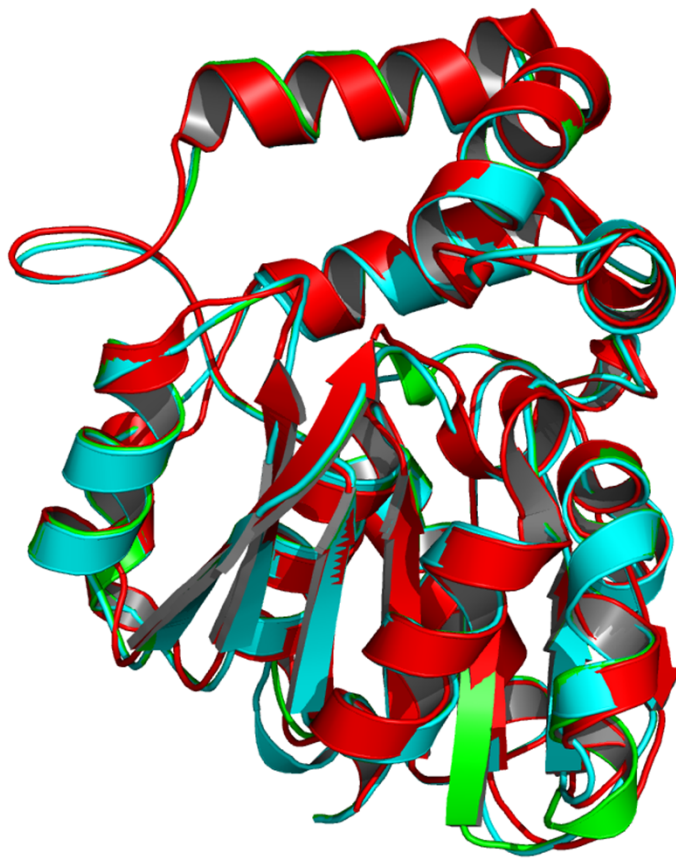

**Green: Os-D14**

**Cyan: At-D14**

**Red: DAD2  
(petunia D14)**

**Supplementary information, Figure S3** Structure overlay of the D14 proteins from petunia (red), rice (green), and *Arabidopsis* (cyan).
