# Supplementary material for: Crystal structures of two phytohormone signal-transducing α/β hydrolases: karrikin-signaling KAI2 and strigolactone-signaling DWARF14
Source: PubMed Central journal article supplement — Cell Res. 2013 Feb 5;23(3):436–9. doi: 10.1038/cr.2013.19 (PMC3587710; doi:10.1038/cr.2013.19), 2013-02-05
Supplement: cr201319x4.pdf [file cr201319x4.pdf]

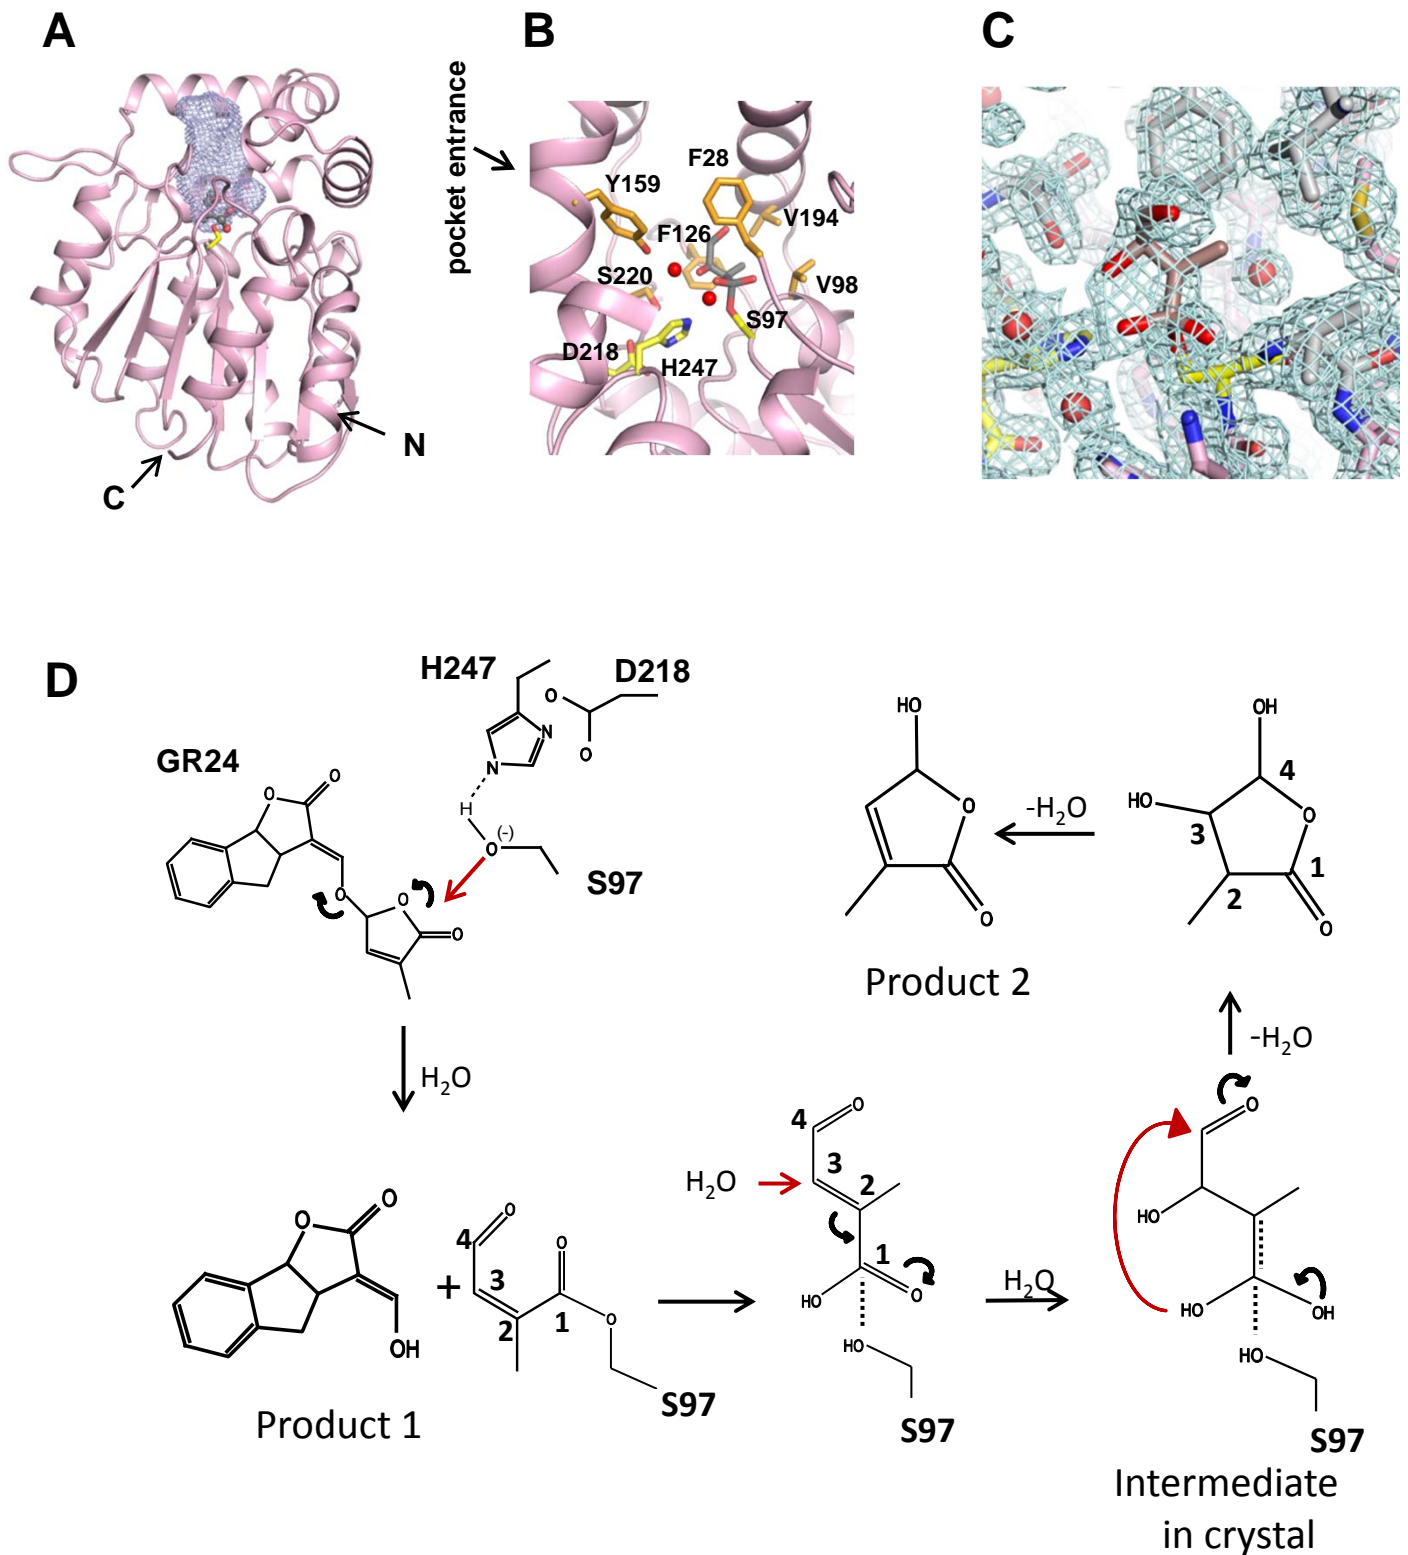

**Supplementary information, Figure S4** The D14 hydrolase mechanism. **(A)** Crystal structure of OsD14 with S97 bound to a catalytic hydrolysis intermediate of GR24. **(B)** Close-up of the intermediate and interacting residues. **(C)** Electron density and interactions of the reaction intermediate in the substrate pocket of OsD14. **(D)** Schematic diagram of the proposed molecular mechanism of GR24 hydrolysis by OsD14.
