# Supplementary material for: Crystal structures of two phytohormone signal-transducing α/β hydrolases: karrikin-signaling KAI2 and strigolactone-signaling DWARF14
Source: PubMed Central journal article supplement — Cell Res. 2013 Feb 5;23(3):436–9. doi: 10.1038/cr.2013.19 (PMC3587710; doi:10.1038/cr.2013.19), 2013-02-05
Supplement: cr201319x5.pdf [file cr201319x5.pdf]

## SABP2

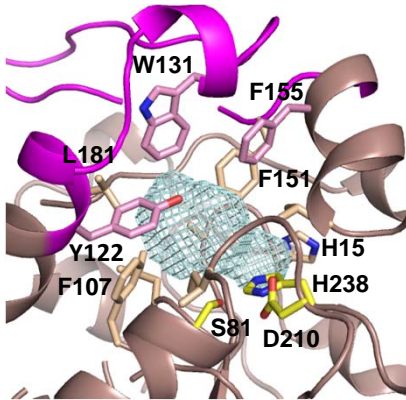

## KAI2

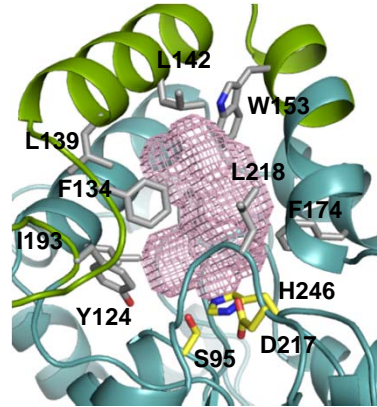

## AtD14

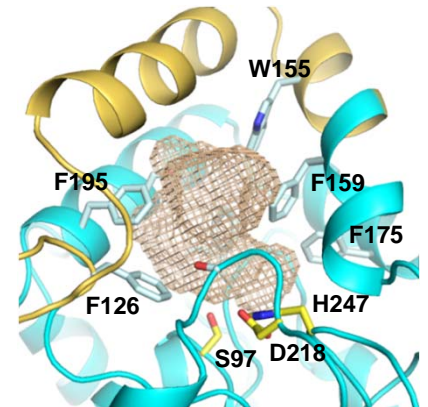

**Supplementary information, Figure S5** Comparison of the conformations of the cap domain of SABP2 (left, with the part different to D14 colored in magenta), with the top domains of KAI2 (middle, with the part different to SABP2 colored in green), and AtD14 (right, with the same part in yellow).
