# Supplementary material for: Crystal structures of two phytohormone signal-transducing α/β hydrolases: karrikin-signaling KAI2 and strigolactone-signaling DWARF14
Source: PubMed Central journal article supplement — Cell Res. 2013 Feb 5;23(3):436–9. doi: 10.1038/cr.2013.19 (PMC3587710; doi:10.1038/cr.2013.19), 2013-02-05
Supplement: cr201319x6.pdf [file cr201319x6.pdf]

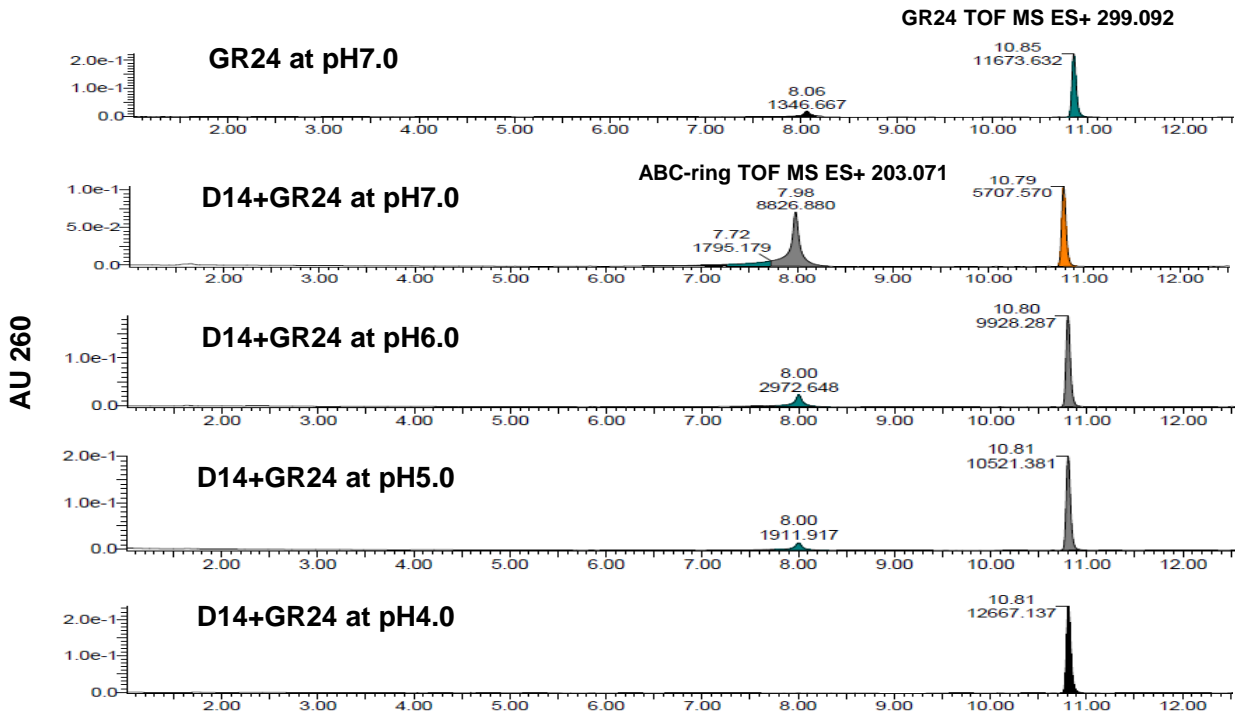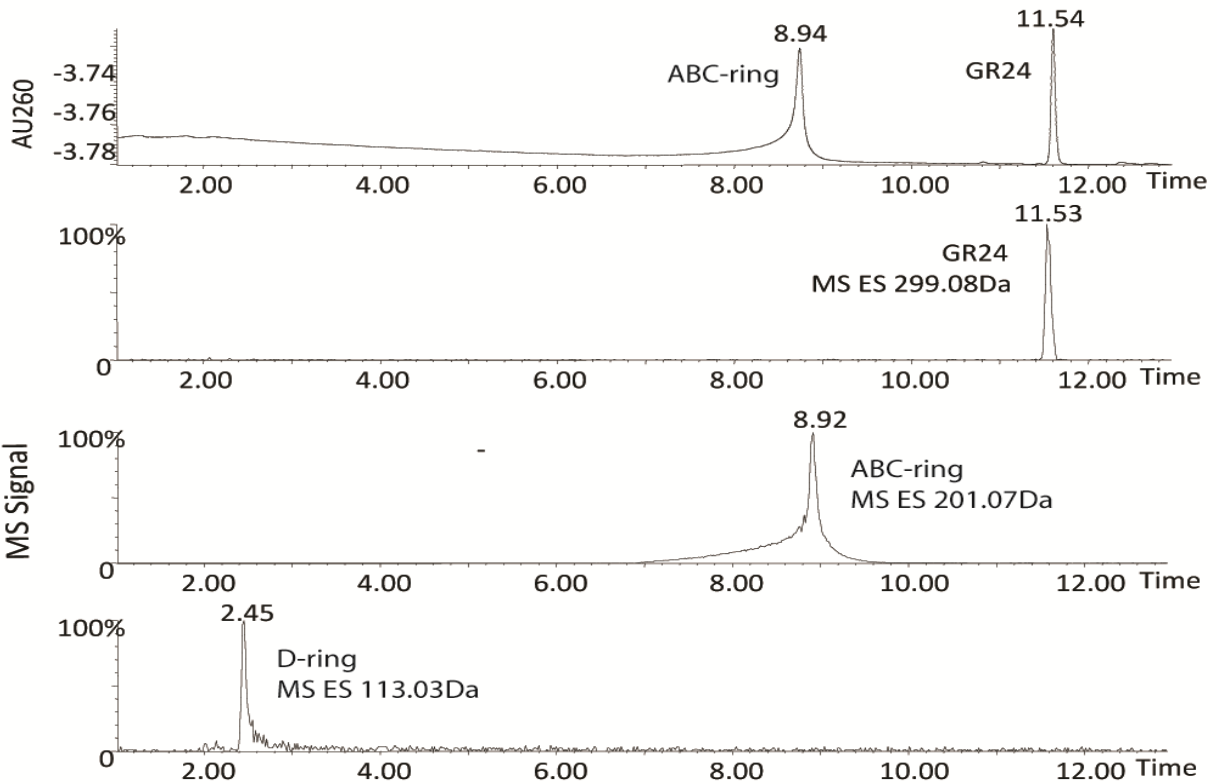

**Supplementary information, Figure S6** UPLC/MS analysis of D14-catalyzed GR24 hydrolysis. **(A)** UPLC-separation of GR24 and the ABC ring GR24 hydrolysis product as determined by UV absorbance and electrospray ionization quadrupole time-of-flight mass spectrometric analysis (ESI-Q-TOF MS). The strong pH-dependence of the reaction reflects the requirement of the triad histidine in its uncharged state in order to function as proton acceptor (pKa of the histidine imidazole ring ~ 6.0). **(B)** Identification of the ABC-ring and D-ring hydrolysis products (see Fig. S4D for chemical structures). GR24 and hydrolysis products were separated by UPLC and analyzed by ESI-Q-TOF-MS. Intact GR24 was detected in positive mode with its neutral mass at 298.08. The D-ring and ABC-ring products were detected in negative mode with their neutral masses of 114.03 and 202.07, respectively. The mass difference of the sum of D-ring plus ABC-ring and intact GR24 is 18.020, which closely matches the molecular weight of a water molecule, consistent with the hydrolysis reaction.
