# Supplementary material for: Crystal structures of two phytohormone signal-transducing α/β hydrolases: karrikin-signaling KAI2 and strigolactone-signaling DWARF14
Source: PubMed Central journal article supplement — Cell Res. 2013 Feb 5;23(3):436–9. doi: 10.1038/cr.2013.19 (PMC3587710; doi:10.1038/cr.2013.19), 2013-02-05
Supplement: cr201319x8.pdf [file cr201319x8.pdf]

**Supplementary information, Table S1** Statistics of data collection and structure refinement

|                                  | AtKAI2                                                            | AtD14                                                               | OsD14                                             | OsD14/lactone                                     |
|----------------------------------|-------------------------------------------------------------------|---------------------------------------------------------------------|---------------------------------------------------|---------------------------------------------------|
| PDB code (*)                     | 4IH1                                                              | 4IH4                                                                | 4IH9                                              | 4IHA                                              |
| Data collection                  |                                                                   |                                                                     |                                                   |                                                   |
| Beam line                        | 21-ID-D APS                                                       | 21-ID-D APS                                                         | BL17U-MX SSRF                                     | BL17U-MX SSRF                                     |
| Space group                      | P21                                                               | C2                                                                  | P212121                                           | P212121                                           |
| Resolution, Å                    | 30-1.55                                                           | 30-3.5                                                              | 40-1.55                                           | 40-1.55                                           |
| Cell parameters, Å, °            | a=51.3, b=56.0, c=53.5; $\alpha=90$ , $\beta=116.1$ , $\gamma=90$ | a=184.8, b=44.6, c=160.9; $\alpha=90$ , $\beta=121.1$ , $\gamma=90$ | a=48.2, b=88.5, c=121.2; $\alpha=\beta=\gamma=90$ | a=48.2, b=88.7, c=118.3; $\alpha=\beta=\gamma=90$ |
| Total/Unique reflections         | 281992/39492                                                      | 51499/12471                                                         | 503908/76211                                      | 509335/74350                                      |
| Completeness, %                  | 99.9 (99.6)                                                       | 83.8 (85.6)                                                         | 100.0 (100.0)                                     | 100.0 (100.0)                                     |
| $I/\sigma$                       | 22.5 (2.5)                                                        | 5.3 (1.7)                                                           | 22.1 (2.2)                                        | 21.8 (2.4)                                        |
| Redundancy                       | 7.1(5.8)                                                          | 4.1(4.0)                                                            | 6.6(6.5)                                          | 6.9(6.9)                                          |
| Rsym                             | 0.10 (0.62)                                                       | 0.20 (0.55)                                                         | 0.08 (0.73)                                       | 0.08 (0.79)                                       |
| Structure determination          |                                                                   |                                                                     |                                                   |                                                   |
| Resolution, Å                    | 30-1.55                                                           | 30-3.5                                                              | 30-1.55                                           | 30-1.55                                           |
| No. reflections                  | 32292                                                             | 9439                                                                | 76002                                             | 63304                                             |
| NCS molecules                    | 1                                                                 | 4                                                                   | 2                                                 | 2                                                 |
| No. residues                     | 268                                                               | 1044                                                                | 530                                               | 540                                               |
| No. solvent molecules            | 114                                                               | 0                                                                   | 374                                               | 425                                               |
| No. of non-H atoms               | 2196                                                              | 8164                                                                | 4466                                              | 4578                                              |
| Rcryst                           | 17.8%                                                             | 27.8%                                                               | 17.9%                                             | 18.1%                                             |
| Rfree                            | 19.2%                                                             | 33.6%                                                               | 19.7%                                             | 20.1%                                             |
| rmsd bonds, Å                    | 0.013                                                             | 0.010                                                               | 0.011                                             | 0.015                                             |
| rmsd angles, °                   | 1.27                                                              | 1.28                                                                | 1.24                                              | 1.46                                              |
| Average B factor, Å <sup>2</sup> | 19.4                                                              | 37.3                                                                | 12.1                                              | 15.6                                              |

Rmsd is for root-mean-square deviation from ideal geometry of protein.

(\*): PDB code and structure factors will be available from RCSB data bank upon publication.
